# Supplementary material
Source: publisher figshare collection journal article supplement (https://acs.figshare.com/ndownloader/files/4753477)
Supplement: Supplementary file 1 [file 4753477]

data_Britt_Corkey_DJG-1

_audit_creation_date                  'Tue Aug 15 13:41:28 2006'
_audit_creation_method                'by teXsan'
_audit_update_record                   ?

#------------------------------------------------------------------------------

# PROCESSING SUMMARY (IUCr Office Use Only) 
_journal_date_recd_electronic          ?
_journal_date_from_coeditor            ?
_journal_date_accepted                 ?
_journal_coeditor_code                 ?

#------------------------------------------------------------------------------

# SUBMISSION DETAILS 
_publ_contact_author_name             ' ENTER NAME'
_publ_contact_author_address
;
    ENTER ADDRESS
;
_publ_contact_author_email            ' ENTER EMAIL ADDRESS '
_publ_contact_author_fax              ' ENTER FAX NUMBER '
_publ_contact_author_phone            ' ENTER PHONE NUMBER '
_publ_contact_letter
;
    ENTER TEXT OF LETTER
;
_publ_requested_journal               ' ENTER JOURNAL NAME HERE'
_publ_requested_category              ' CHOOSE FI FM FO CI CM CO or AD'

_publ_requested_coeditor_name          ?

#------------------------------------------------------------------------------

# TITLE AND AUTHOR LIST 

_publ_section_title
;
    ENTER SECTION TITLE
;

_publ_section_title_footnote
;
    ENTER FOOTNOTE TO TITLE OF PAPER
;
loop_
_publ_author_name
_publ_author_address
' FIRST AUTHORS NAME '
;
  FIRST AUTHORS ADDRESS
;

#------------------------------------------------------------------------------

# TEXT 

_publ_section_abstract
;
    ENTER ABSTRACT
;

_publ_section_comment
;
    ENTER TEXT
;

_publ_section_acknowledgements
;
    ENTER ACKNOWLEDGEMENTS
;

_publ_section_references
;
    ENTER OTHER REFERENCES
Molecular Structure Corporation, Rigaku Corporation. (1998). teXsan. 
Single Crystal Structure Analysis Software. Version 1.10.
MSC, 3200 Research Forest Drive, The Woodlands, TX 77381, USA.
Rigaku, 3-9-12 Akishima, Tokyo, Japan.
Blessing, R. H., (1995), Acta Crystallogr, A51, 33-38.
;

_publ_section_figure_captions
;
    ENTER FIGURE CAPTIONS
;

_publ_section_exptl_prep
;
    ENTER COMPOUND PREPARATION DETAILS
;

_publ_section_exptl_refinement
;
    ENTER SPECIAL DETAILS OF THE REFINEMENT
;

#------------------------------------------------------------------------------

# CHEMICAL DATA 
_chemical_formula_sum                  'C17 H18 O2 '
_chemical_formula_moiety               'C17 H18 O2 '
_chemical_formula_weight               254.33
_chemical_melting_point                ?

#------------------------------------------------------------------------------

# CRYSTAL DATA 
_symmetry_cell_setting                 monoclinic
_symmetry_space_group_name_H-M        'P 21       '
_symmetry_Int_Tables_number            4
_symmetry_space_group_name_Hall        ?

#------------------------------------------------------------------------------

loop_
_symmetry_equiv_pos_as_xyz
x,y,z
-x,1/2+y,-z
_cell_length_a                         8.545(2)
_cell_length_b                         8.875(2)
_cell_length_c                         9.964(2)
_cell_angle_alpha                      90
_cell_angle_beta                       113.978(3)
_cell_angle_gamma                      90
_cell_volume                           690.4(3)
_cell_formula_units_Z                  2
_cell_measurement_reflns_used          1703
_cell_measurement_theta_min            3.5
_cell_measurement_theta_max            24.5
_cell_measurement_temperature          115.2

#------------------------------------------------------------------------------

_exptl_crystal_description            'blocklike'
_exptl_crystal_colour                 'colorless'
_exptl_crystal_size_max                0.340
_exptl_crystal_size_mid                0.240
_exptl_crystal_size_min                0.210
_exptl_crystal_size_rad                ?
_exptl_crystal_density_diffrn          1.223
_exptl_crystal_density_meas            ?
_exptl_crystal_density_method         'not measured'
_exptl_crystal_F_000                   272.00
_exptl_absorpt_coefficient_mu          0.079
_exptl_absorpt_correction_type         empirical
_exptl_absorpt_process_details         'Blessing, 1995'
_exptl_absorpt_correction_T_min        0.885
_exptl_absorpt_correction_T_max        0.984

#------------------------------------------------------------------------------

# EXPERIMENTAL DATA 
_diffrn_radiation_type                'Mo K\a'
_diffrn_radiation_wavelength           0.7107
_diffrn_measurement_device_type        'Bruker SMART 1000'
_diffrn_measurement_method             \w-scans
_diffrn_standards_number               0
_diffrn_standards_interval_count       0
_diffrn_standards_interval_time        0
_diffrn_standards_decay_%              0
_diffrn_reflns_number                  3092
_diffrn_reflns_av_R_equivalents        0.011
_diffrn_reflns_theta_max               24.70
_diffrn_measured_fraction_theta_max    1.6616
_diffrn_reflns_theta_full              24.70
_diffrn_measured_fraction_theta_full   1.6616
_diffrn_reflns_limit_h_min             0
_diffrn_reflns_limit_h_max             10
_diffrn_reflns_limit_k_min             -10
_diffrn_reflns_limit_k_max             9
_diffrn_reflns_limit_l_min             -11
_diffrn_reflns_limit_l_max             10

#------------------------------------------------------------------------------

# REFINEMENT DATA 
_refine_special_details
;
Refinement using reflections with F^2^ > 3.0 sigma(F^2^). The weighted R-factor
(wR), goodness of fit (S) and R-factor (gt) are based on F, with F set to zero 
for negative F. The threshold expression of F^2^ > 3.0 sigma(F^2^) is used only 
for calculating R-factor (gt).
;
_reflns_number_total                   2087
_reflns_number_gt                      1834
_reflns_threshold_expression           F^2^>3.0\s(F^2^)
_refine_ls_structure_factor_coef       F
_refine_ls_R_factor_gt                 0.0321
_refine_ls_wR_factor_ref               0.0397
_refine_ls_R_factor_all                0.0373
_refine_ls_wR_factor_all               0.0405
_refine_ls_hydrogen_treatment          constr
_refine_ls_number_reflns               1834
_refine_ls_number_parameters           171
_refine_ls_goodness_of_fit_ref         1.851
_refine_ls_weighting_scheme            calc
_refine_ls_weighting_details
   'w = 1/[\s^2^(Fo) + 0.00022|Fo|^2^]'
_refine_ls_shift/su_max                0.0002
_refine_diff_density_max               0.10
_refine_diff_density_min               -0.11
_refine_ls_extinction_method           none
_refine_ls_extinction_coef             ?
_refine_ls_abs_structure_details       ?
_refine_ls_abs_structure_Flack         ?
loop_
_atom_type_symbol
_atom_type_description
_atom_type_scat_dispersion_real
_atom_type_scat_dispersion_imag
_atom_type_scat_source
  'C' 'C'  0.003 0.002 
;International Tables for Crystallography
(1992, Vol. C, Tables 4.2.6.8 and 6.1.1.1)
;
  'O' 'O'  0.011 0.006 
;International Tables for Crystallography
(1992, Vol. C, Tables 4.2.6.8 and 6.1.1.1)
;
  'H' 'H'  0.000 0.000 
;International Tables for Crystallography
(1992, Vol. C, Table 6.1.1.2)
;

#------------------------------------------------------------------------------

_computing_data_collection            'Bruker-AXS SMART v5.054'
_computing_cell_refinement            'Bruker-AXS SAINT v6.40'
_computing_data_reduction             'Bruker-AXS SAINT v6.40'
_computing_structure_solution          SIR97
_computing_structure_refinement       'teXsan'
_computing_publication_material       'teXsan'
_computing_molecular_graphics          ?

#------------------------------------------------------------------------------

# ATOMIC COORDINATES AND DISPLACEMENT PARAMETERS 
loop_
_atom_site_label
_atom_site_type_symbol
_atom_site_fract_x
_atom_site_fract_y
_atom_site_fract_z
_atom_site_U_iso_or_equiv
_atom_site_adp_type
_atom_site_occupancy
_atom_site_calc_flag
_atom_site_refinement_flags
_atom_site_disorder_assembly
_atom_site_disorder_group
 O1     O  -0.1554(2)  0.6138      0.6228(1)   0.0319(4)   Uani 1.00 d . . .
 O2     O  -0.4350(2)  0.6240(2)   0.5743(2)   0.0619(6)   Uani 1.00 d . . .
 C1     C  -0.2430(2)  0.2875(3)   0.7540(2)   0.0318(6)   Uani 1.00 d . . .
 C2     C  -0.2077(3)  0.1979(3)   0.8873(2)   0.0342(6)   Uani 1.00 d . . .
 C3     C  -0.1375(3)  0.2770(3)   1.0327(2)   0.0353(6)   Uani 1.00 d . . .
 C4     C  -0.0204(3)  0.1816(2)   0.9911(2)   0.0325(6)   Uani 1.00 d . . .
 C5     C  0.1100(2)   0.2479(2)   0.9473(2)   0.0276(5)   Uani 1.00 d . . .
 C6     C  0.2823(3)   0.2145(3)   1.0254(2)   0.0386(6)   Uani 1.00 d . . .
 C7     C  0.4075(3)   0.2794(3)   0.9894(2)   0.0439(7)   Uani 1.00 d . . .
 C8     C  0.3607(3)   0.3779(3)   0.8717(3)   0.0397(7)   Uani 1.00 d . . .
 C9     C  0.1898(2)   0.4074(3)   0.7891(2)   0.0292(5)   Uani 1.00 d . . .
 C10    C  0.0616(2)   0.3434(2)   0.8239(2)   0.0244(5)   Uani 1.00 d . . .
 C11    C  -0.1223(2)  0.3625(2)   0.7271(2)   0.0236(5)   Uani 1.00 d . . .
 C12    C  -0.1685(3)  0.4553(3)   0.5932(2)   0.0284(6)   Uani 1.00 d . . .
 C13    C  -0.2059(2)  0.4091(3)   0.4577(2)   0.0309(6)   Uani 1.00 d . . .
 C14    C  -0.2027(3)  0.2465(3)   0.4219(2)   0.0356(6)   Uani 1.00 d . . .
 C15    C  -0.2531(3)  0.5162(3)   0.3291(2)   0.0444(7)   Uani 1.00 d . . .
 C16    C  -0.3015(3)  0.6869(3)   0.6062(2)   0.0387(6)   Uani 1.00 d . . .
 C17    C  -0.2703(3)  0.8525(3)   0.6304(3)   0.0534(8)   Uani 1.00 d . . .
 H1     H  -0.3580     0.2928      0.6827      0.0382      Uiso 1.00 calc . . .
 H2     H  -0.2798     0.1134      0.8781      0.0410      Uiso 1.00 calc . . .
 H3     H  -0.1250     0.3834      1.0363      0.0423      Uiso 1.00 calc . . .
 H4     H  -0.1701     0.2448      1.1086      0.0423      Uiso 1.00 calc . . .
 H5     H  0.0098      0.0875      1.0406      0.0392      Uiso 1.00 calc . . .
 H6     H  0.3150      0.1457      1.1052      0.0464      Uiso 1.00 calc . . .
 H7     H  0.5249      0.2563      1.0451      0.0528      Uiso 1.00 calc . . .
 H8     H  0.4461      0.4251      0.8480      0.0477      Uiso 1.00 calc . . .
 H9     H  0.1585      0.4727      0.7066      0.0351      Uiso 1.00 calc . . .
 H10    H  -0.1550     0.1899      0.5102      0.0430      Uiso 1.00 calc . . .
 H11    H  -0.1350     0.2331      0.3671      0.0430      Uiso 1.00 calc . . .
 H12    H  -0.3162     0.2129      0.3653      0.0430      Uiso 1.00 calc . . .
 H13    H  -0.1844     0.4957      0.2765      0.0535      Uiso 1.00 calc . . .
 H14    H  -0.2342     0.6171      0.3642      0.0535      Uiso 1.00 calc . . .
 H15    H  -0.3705     0.5035      0.2658      0.0535      Uiso 1.00 calc . . .
 H16    H  -0.2085     0.8716      0.7323      0.0644      Uiso 1.00 calc . . .
 H17    H  -0.3768     0.9041      0.5961      0.0644      Uiso 1.00 calc . . .
 H18    H  -0.2056     0.8870      0.5782      0.0644      Uiso 1.00 calc . . .

loop_
_atom_site_aniso_label
_atom_site_aniso_U_11
_atom_site_aniso_U_22
_atom_site_aniso_U_33
_atom_site_aniso_U_12
_atom_site_aniso_U_13
_atom_site_aniso_U_23
 O1     0.0356(8)   0.0253(7)   0.0322(8)   0.0025(6)   0.0111(6)   0.0004(6)  
 O2     0.0326(9)   0.051(1)    0.090(1)    0.0063(9)   0.0126(9)   -0.022(1)  
 C1     0.029(1)    0.037(1)    0.028(1)    -0.0020(9)  0.0095(9)   -0.0013(9) 
 C2     0.037(1)    0.037(1)    0.032(1)    -0.0107(9)  0.0170(10)  0.0000(9)  
 C3     0.044(1)    0.037(1)    0.032(1)    0.000(1)    0.023(1)    0.0027(10) 
 C4     0.042(1)    0.026(1)    0.031(1)    0.0063(9)   0.0164(10)  0.0065(9)  
 C5     0.031(1)    0.027(1)    0.024(1)    0.0062(9)   0.0104(9)   -0.0027(8) 
 C6     0.039(1)    0.044(1)    0.029(1)    0.013(1)    0.011(1)    0.0022(9)  
 C7     0.026(1)    0.061(2)    0.038(1)    0.009(1)    0.006(1)    -0.007(1)  
 C8     0.029(1)    0.041(1)    0.052(1)    -0.0058(10) 0.019(1)    -0.013(1)  
 C9     0.030(1)    0.0264(10)  0.032(1)    -0.0022(9)  0.0140(9)   -0.0031(9) 
 C10    0.027(1)    0.0209(9)   0.025(1)    0.0014(8)   0.0110(9)   -0.0052(8) 
 C11    0.0244(10)  0.025(1)    0.023(1)    0.0017(8)   0.0111(9)   -0.0033(8) 
 C12    0.028(1)    0.027(1)    0.032(1)    0.0038(8)   0.0135(10)  0.0012(8)  
 C13    0.033(1)    0.033(1)    0.028(1)    0.0061(9)   0.0133(10)  0.0047(9)  
 C14    0.045(1)    0.036(1)    0.029(1)    0.002(1)    0.018(1)    -0.0004(9) 
 C15    0.060(2)    0.044(1)    0.027(1)    0.001(1)    0.016(1)    0.004(1)   
 C16    0.039(1)    0.036(1)    0.032(1)    0.010(1)    0.005(1)    -0.0028(10)
 C17    0.068(2)    0.031(1)    0.050(2)    0.014(1)    0.013(1)    -0.003(1)  

#------------------------------------------------------------------------------

_geom_special_details
;
 ?
;
loop_
_geom_bond_atom_site_label_1
_geom_bond_atom_site_label_2
_geom_bond_distance
_geom_bond_site_symmetry_1
_geom_bond_site_symmetry_2
_geom_bond_publ_flag
 O1        C12       1.433(2)   . . yes
 O1        C16       1.356(2)   . . yes
 O2        C16       1.191(3)   . . yes
 C1        C2        1.471(3)   . . yes
 C1        C11       1.343(3)   . . yes
 C2        C3        1.498(3)   . . yes
 C2        C4        1.519(3)   . . yes
 C3        C4        1.492(3)   . . yes
 C4        C5        1.474(3)   . . yes
 C5        C6        1.389(3)   . . yes
 C5        C10       1.410(2)   . . yes
 C6        C7        1.385(3)   . . yes
 C7        C8        1.385(3)   . . yes
 C8        C9        1.379(3)   . . yes
 C9        C10       1.397(3)   . . yes
 C10       C11       1.482(3)   . . yes
 C11       C12       1.479(3)   . . yes
 C12       C13       1.320(3)   . . yes
 C13       C14       1.490(3)   . . yes
 C13       C15       1.512(3)   . . yes
 C16       C17       1.496(3)   . . yes
 C1        H1        0.951      . . no
 C2        H2        0.950      . . no
 C3        H3        0.950      . . no
 C3        H4        0.950      . . no
 C4        H5        0.950      . . no
 C6        H6        0.950      . . no
 C7        H7        0.950      . . no
 C8        H8        0.951      . . no
 C9        H9        0.951      . . no
 C14       H10       0.949      . . no
 C14       H11       0.950      . . no
 C14       H12       0.950      . . no
 C15       H13       0.950      . . no
 C15       H14       0.951      . . no
 C15       H15       0.950      . . no
 C17       H16       0.950      . . no
 C17       H17       0.950      . . no
 C17       H18       0.950      . . no

#------------------------------------------------------------------------------

loop_
_geom_angle_atom_site_label_1
_geom_angle_atom_site_label_2
_geom_angle_atom_site_label_3
_geom_angle
_geom_angle_site_symmetry_1
_geom_angle_site_symmetry_2
_geom_angle_site_symmetry_3
_geom_angle_publ_flag
 C12       O1        C16       117.0(2)    .  .  .  ?
 C2        C1        C11       123.8(2)    .  .  .  ?
 C1        C2        C3        118.3(2)    .  .  .  ?
 C1        C2        C4        116.0(2)    .  .  .  ?
 C3        C2        C4        59.3(1)     .  .  .  ?
 C2        C3        C4        61.1(1)     .  .  .  ?
 C2        C4        C3        59.7(1)     .  .  .  ?
 C2        C4        C5        118.3(2)    .  .  .  ?
 C3        C4        C5        121.9(2)    .  .  .  ?
 C4        C5        C6        120.4(2)    .  .  .  ?
 C4        C5        C10       120.6(2)    .  .  .  ?
 C6        C5        C10       119.0(2)    .  .  .  ?
 C5        C6        C7        121.4(2)    .  .  .  ?
 C6        C7        C8        119.6(2)    .  .  .  ?
 C7        C8        C9        119.8(2)    .  .  .  ?
 C8        C9        C10       121.5(2)    .  .  .  ?
 C5        C10       C9        118.6(2)    .  .  .  ?
 C5        C10       C11       119.6(2)    .  .  .  ?
 C9        C10       C11       121.5(2)    .  .  .  ?
 C1        C11       C10       120.7(2)    .  .  .  ?
 C1        C11       C12       120.7(2)    .  .  .  ?
 C10       C11       C12       118.4(2)    .  .  .  ?
 O1        C12       C11       113.0(2)    .  .  .  ?
 O1        C12       C13       118.8(2)    .  .  .  ?
 C11       C12       C13       127.9(2)    .  .  .  ?
 C12       C13       C14       121.7(2)    .  .  .  ?
 C12       C13       C15       122.8(2)    .  .  .  ?
 C14       C13       C15       115.5(2)    .  .  .  ?
 O1        C16       O2        122.9(2)    .  .  .  ?
 O1        C16       C17       110.8(2)    .  .  .  ?
 O2        C16       C17       126.3(2)    .  .  .  ?
 C2        C1        H1        118.120     .  .  .  no
 C11       C1        H1        118.088     .  .  .  no
 C1        C2        H2        116.905     .  .  .  no
 C3        C2        H2        116.879     .  .  .  no
 C4        C2        H2        116.906     .  .  .  no
 C2        C3        H3        119.833     .  .  .  no
 C2        C3        H4        119.807     .  .  .  no
 C4        C3        H3        119.822     .  .  .  no
 C4        C3        H4        119.814     .  .  .  no
 H3        C3        H4        109.472     .  .  .  no
 C2        C4        H5        115.172     .  .  .  no
 C3        C4        H5        115.199     .  .  .  no
 C5        C4        H5        115.194     .  .  .  no
 C5        C6        H6        119.322     .  .  .  no
 C7        C6        H6        119.276     .  .  .  no
 C6        C7        H7        120.171     .  .  .  no
 C8        C7        H7        120.230     .  .  .  no
 C7        C8        H8        120.100     .  .  .  no
 C9        C8        H8        120.143     .  .  .  no
 C8        C9        H9        119.268     .  .  .  no
 C10       C9        H9        119.274     .  .  .  no
 C13       C14       H10       109.447     .  .  .  no
 C13       C14       H11       109.427     .  .  .  no
 C13       C14       H12       109.439     .  .  .  no
 H10       C14       H11       109.504     .  .  .  no
 H10       C14       H12       109.538     .  .  .  no
 H11       C14       H12       109.472     .  .  .  no
 C13       C15       H13       109.559     .  .  .  no
 C13       C15       H14       109.441     .  .  .  no
 C13       C15       H15       109.497     .  .  .  no
 H13       C15       H14       109.450     .  .  .  no
 H13       C15       H15       109.495     .  .  .  no
 H14       C15       H15       109.385     .  .  .  no
 C16       C17       H16       109.449     .  .  .  no
 C16       C17       H17       109.512     .  .  .  no
 C16       C17       H18       109.470     .  .  .  no
 H16       C17       H17       109.478     .  .  .  no
 H16       C17       H18       109.437     .  .  .  no
 H17       C17       H18       109.482     .  .  .  no

#------------------------------------------------------------------------------

loop_
_geom_torsion_atom_site_label_1
_geom_torsion_atom_site_label_2
_geom_torsion_atom_site_label_3
_geom_torsion_atom_site_label_4
_geom_torsion
_geom_torsion_site_symmetry_1
_geom_torsion_site_symmetry_2
_geom_torsion_site_symmetry_3
_geom_torsion_site_symmetry_4
_geom_torsion_publ_flag
   O1      C12     C11     C1      108.2(2) 1_555 1_555 1_555 1_555 yes
   O1      C12     C11     C10     -77.1(2) 1_555 1_555 1_555 1_555 yes
   O1      C12     C13     C14     173.2(2) 1_555 1_555 1_555 1_555 yes
   O1      C12     C13     C15     -6.4(3)  1_555 1_555 1_555 1_555 yes
   O2      C16     O1      C12     3.0(3)   1_555 1_555 1_555 1_555 yes
   C1      C2      C3      C4      -105.0(2) 1_555 1_555 1_555 1_555 yes
   C1      C2      C4      C3      108.9(2) 1_555 1_555 1_555 1_555 yes
   C1      C2      C4      C5      -3.5(3)  1_555 1_555 1_555 1_555 yes
   C1      C11     C10     C5      -1.3(3)  1_555 1_555 1_555 1_555 yes
   C1      C11     C10     C9      173.0(2) 1_555 1_555 1_555 1_555 yes
   C1      C11     C12     C13     -77.2(3) 1_555 1_555 1_555 1_555 yes
   C2      C1      C11     C10     7.9(3)   1_555 1_555 1_555 1_555 yes
   C2      C1      C11     C12     -177.5(2) 1_555 1_555 1_555 1_555 yes
   C2      C3      C4      C5      106.4(2) 1_555 1_555 1_555 1_555 yes
   C2      C4      C5      C6      -169.0(2) 1_555 1_555 1_555 1_555 yes
   C2      C4      C5      C10     9.7(3)   1_555 1_555 1_555 1_555 yes
   C3      C2      C1      C11     62.2(3)  1_555 1_555 1_555 1_555 yes
   C3      C2      C4      C5      -112.4(2) 1_555 1_555 1_555 1_555 yes
   C3      C4      C5      C6      120.9(2) 1_555 1_555 1_555 1_555 yes
   C3      C4      C5      C10     -60.4(3) 1_555 1_555 1_555 1_555 yes
   C4      C2      C1      C11     -5.3(3)  1_555 1_555 1_555 1_555 yes
   C4      C5      C6      C7      -177.8(2) 1_555 1_555 1_555 1_555 yes
   C4      C5      C10     C9      178.0(2) 1_555 1_555 1_555 1_555 yes
   C4      C5      C10     C11     -7.5(2)  1_555 1_555 1_555 1_555 yes
   C5      C6      C7      C8      -1.1(3)  1_555 1_555 1_555 1_555 yes
   C5      C10     C9      C8      0.6(3)   1_555 1_555 1_555 1_555 yes
   C5      C10     C11     C12     -176.0(2) 1_555 1_555 1_555 1_555 yes
   C6      C5      C10     C9      -3.3(3)  1_555 1_555 1_555 1_555 yes
   C6      C5      C10     C11     171.2(2) 1_555 1_555 1_555 1_555 yes
   C6      C7      C8      C9      -1.7(3)  1_555 1_555 1_555 1_555 yes
   C7      C6      C5      C10     3.6(3)   1_555 1_555 1_555 1_555 yes
   C7      C8      C9      C10     1.9(3)   1_555 1_555 1_555 1_555 yes
   C8      C9      C10     C11     -173.7(2) 1_555 1_555 1_555 1_555 yes
   C9      C10     C11     C12     -1.7(2)  1_555 1_555 1_555 1_555 yes
   C10     C11     C12     C13     97.5(2)  1_555 1_555 1_555 1_555 yes
   C11     C12     O1      C16     -96.6(2) 1_555 1_555 1_555 1_555 yes
   C11     C12     C13     C14     -1.1(3)  1_555 1_555 1_555 1_555 yes
   C11     C12     C13     C15     179.4(2) 1_555 1_555 1_555 1_555 yes
   C12     O1      C16     C17     -175.9(2) 1_555 1_555 1_555 1_555 yes
   C13     C12     O1      C16     88.3(2)  1_555 1_555 1_555 1_555 yes

#------------------------------------------------------------------------------

loop_
_geom_contact_atom_site_label_1
_geom_contact_atom_site_label_2
_geom_contact_distance
_geom_contact_site_symmetry_1
_geom_contact_site_symmetry_2
_geom_contact_publ_flag
 O1        C14       3.472(3)   . 2_556 ?
 O1        C4        3.566(2)   . 2_557 ?
 O2        C14       3.296(3)   . 2_456 ?
 O2        C17       3.483(3)   . 2_446 ?

#------------------------------------------------------------------------------
